# Supplementary figures and images for: {(μ-L)[RuII(acac)2]2}n, n = 2+, +, 0, −, 2−, with L = 3,3′,4,4′-tetraimino-3,3′,4,4′-tetrahydrobiphenyl. EPR-supported assignment of NIR absorptions for the paramagnetic intermediates
Source: Royal Society of Chemistry journal article supplement (doi:10.1039/b315927m), 2004-01-01

**Fig. S1**

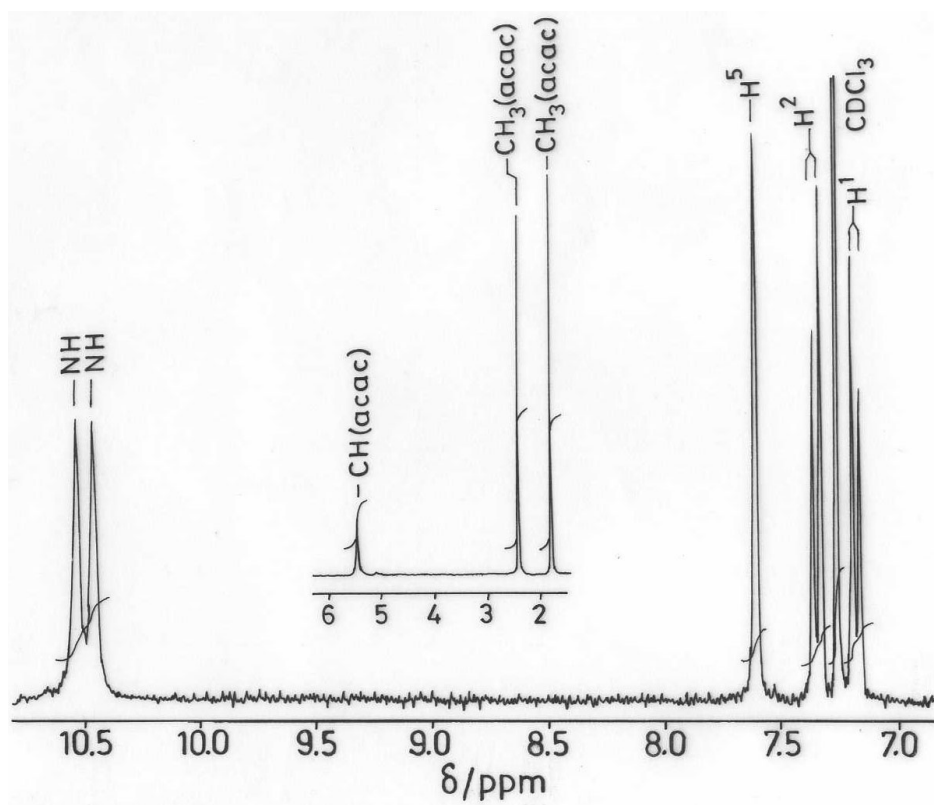

**Fig. S2**

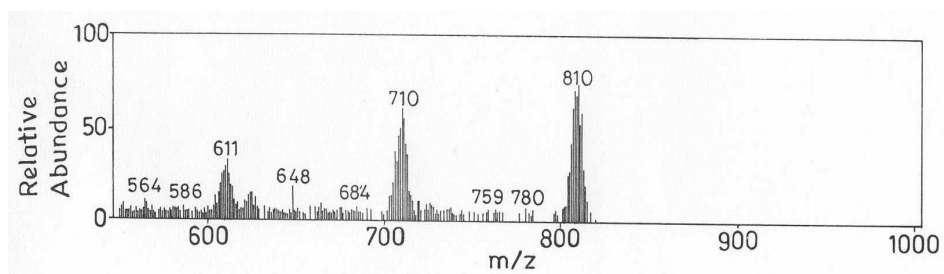

Supplement: b315927m.pdf [file b315927m.pdf]
